# Supplementary material
Source: Springer Nature journal article supplement (https://www.springermedizin.de/resource/supplementary/13229_2013_83_MOESM5_ESM.pdf/9676132)

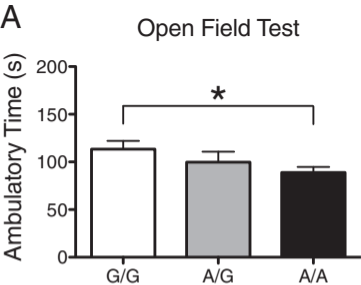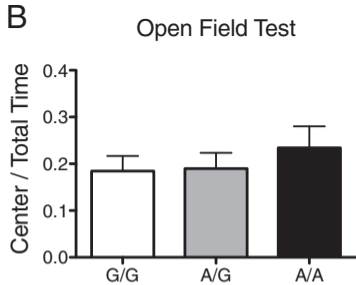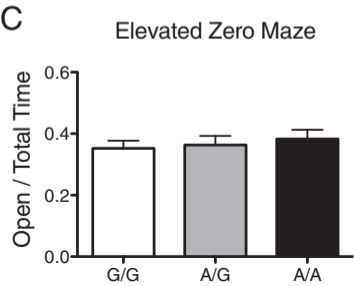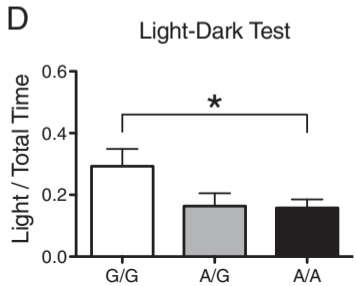

Supplement: MOESM5 [file 9676132]
